# Supplementary material for: Association between Allostatic Load and Stroke Risk: A Cross-Sectional and Longitudinal Analysis
Source: Research Square preprint supplement (doi:10.21203/rs.3.rs-8390604/v1), 2026-01-21
Supplement: Supplementary file 1 [file 4a2ef3ae6e9d601e22370d6d.docx]

**Supplementary Material**

**Table S1. Cut points for each AL components in the China Health and Retirement Longitudinal Study.**

| **Biomarkers** | **Cut points** |
| --- | --- |
| **Cardiovascular System** |  |
| Systolic blood pressure (SBP) | ≥140 mmHg |
| Diastolic blood pressure (DBP) | ≥90 mmHg |
| **Metabolic System** |  |
| Body mass index (BMI) | ≤18.5 kg/m2; ≥25.0 kg/m2 |
| High-density lipoprotein (HDL) cholesterol | <40 mg/dL |
| Low-density lipoprotein (LDL) cholesterol | >160 mg/dL |
| Total cholesterol (TC) | ≥240 mg/dL |
| Glycated hemoglobin (HbA1c) | ≥6.5% |
| Glucose | ≥126 mg/dL |
| **Inflammation System** |  |
| C-reactive protein (CRP) | >3 mg/L |
| **Renal System** |  |
| Cystatin C | >1.03 mg/L |
| Blood urea nitrogen (BUN) | >20 mg/dL |

**Table S2 Association between baseline AL and stroke in hypertension participants in 2011**

|  | Hypertension | | Non-hypertension | |
| --- | --- | --- | --- | --- |
|  | OR (95%CI) | P-value | OR (95%CI) | P-value |
| AL (categorical variable) |  |  |  |  |
| Low AL | 1 (Reference) |  | 1 (Reference) |  |
| Medium AL | 0.760(0.428,1.393) | 0.358 | 2.045(1.082,4.080) | 0.033 |
| High AL | 1.124(0.661,1.998) | 0.677 | 2.722(1.336,5.700) | 0.006 |

Abbreviations: AL, allostatic load; OR: odds ratio; CI: confidence interval.

**Table S3 The interaction between hypertension and AL in the risk of stroke**

|  | Main effect | | Interaction | |
| --- | --- | --- | --- | --- |
|  | OR (95%CI) | P-value | OR (95%CI) | P-value |
| AL (categorical variable) |  |  |  |  |
| Low AL | 1 (Reference) |  |  |  |
| Medium AL | 1.911(0.983,3.939) | 0.065 | 0.408(0.160,1.017) | 0.055 |
| High AL | 2.462(1.176,5.333) | 0.018 | 0.387(0.150,0.994) | 0.048 |
| Hypertension | 7.257(3.397,15.954) | ＜0.001 |  |  |

Abbreviations: AL, allostatic load; OR: odds ratio; CI: confidence interval.

**Table S4 The mediating effect of hypertension in AL and stroke risk**

| **Effect Type** | OR | 95%CI | P-value |
| --- | --- | --- | --- |
| ACME | 0.002 | (0.001, 0.004) | <0.001 |
| ADE | 0.003 | (-0.001, 0.006) | 0.068 |
| Total Effect | 0.005 | (0.003, 0.008) | <0.001 |
| Proportion Mediated | 44.75% | (23.34%, 119.00%) | <0.001 |

Abbreviations: ACME: Average Causal Mediation Effect；ADE: Average Direct Effect; OR: odds ratio; CI: confidence interval.
